# Supplementary material for: Urinary Leukotriene E4 as a Biomarker in NSAID-Exacerbated Respiratory Disease (N-ERD): a Systematic Review and Meta-analysis
Source: Springer Nature journal article supplement (doi:10.1007/s11882-022-01049-8), 2022-11-14
Supplement: MOESM1 [file 23710094]

Article title: Urinary leukotriene E4 as a biomarker in NSAID-exacerbated respiratory disease (N-ERD): a systematic review and meta-analysis

Journal name: Current Allergy and Asthma Reports

Author names: Malcolm Marquette, Bhavesh V Tailor, Philip C Calder, Peter J Curtis, Andrew M Wilson

Corresponding author: Dr Malcolm Marquette, Department of Respiratory Medicine, Norfolk & Norwich University Hospital, Norwich, UK; M.Marquette@uea.ac.uk

### Online Resource 1 Detailing the search strategy

Searches performed using Healthcare Databases Advanced Search (HDAS) – 05/01/2021

The MEDLINE search strategy is listed below:

| #  | Database searched | Search term                                         | Results |
|----|-------------------|-----------------------------------------------------|---------|
| 1  | MEDLINE           | "LEUKOTRIENE E4"/                                   | 959     |
| 2  | MEDLINE           | "LEUKOTRIENE E4"/ur                                 | 309     |
| 3  | MEDLINE           | (ulte4).ti,ab                                       | 32      |
| 4  | MEDLINE           | (lte4).ti,ab                                        | 1109    |
| 5  | MEDLINE           | (Leukotriene ADJ (E4 OR "E 4")).af                  | 1191    |
| 6  | MEDLINE           | (1 OR 3 OR 4 OR 5)                                  | 1741    |
| 7  | MEDLINE           | (ur).fs OR (urine).af OR (urinary).af               | 673670  |
| 8  | MEDLINE           | (6 AND 7)                                           | 579     |
| 9  | MEDLINE           | (2 OR 8)                                            | 579     |
| 10 | MEDLINE           | exp ASTHMA/ OR NASAL POLYPS/ OR (sampters triad).af | 135337  |
| 11 | MEDLINE           | asa OR aspirin* OR aerd OR (acetylsalicyl*).af      | 101422  |
| 12 | MEDLINE           | (9 AND 11)                                          | 122     |
| 13 | MEDLINE           | asthma* OR (polyp*).af                              | 326391  |
| 14 | MEDLINE           | (9 AND 13)                                          | 330     |
| 15 | MEDLINE           | (9 AND 10)                                          | 279     |
| 16 | MEDLINE           | (12 OR 14 OR 15)                                    | 344     |
| 17 | MEDLINE           | (12 OR 14 OR 15) [Languages English]                | 318     |
